# Supplementary material for: Global Regulator MorA Affects Virulence-Associated Protease Secretion in Pseudomonas aeruginosa PAO1
Source: PubMed Central journal article supplement (PMC4404142; doi:10.1371/journal.pone.0123805), 2015-04-20
Supplement: pone.0123805.s001.pdf [file pone.0123805.s001.pdf]

# Global Regulator MorA affects Virulence-associated Protease Secretion in *Pseudomonas aeruginosa* PAO1

## Supporting Information

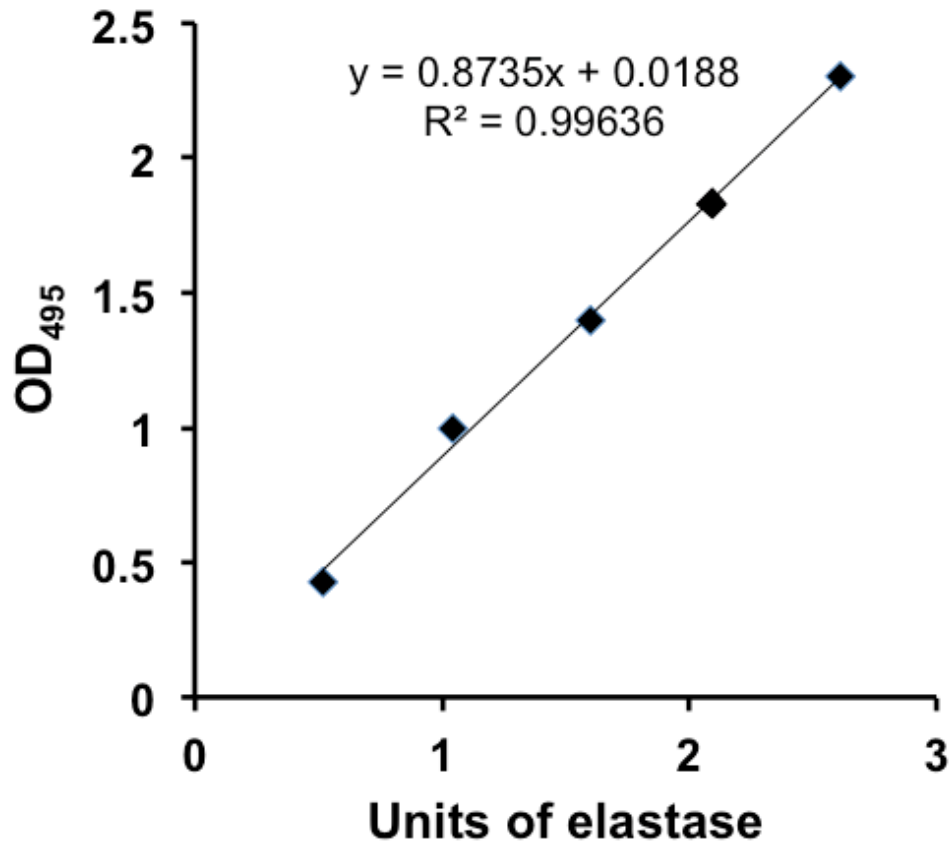

**S1 Figure. Standard curve for elastase activity.** Activity measured with increasing units of *Pseudomonas aeruginosa* elastase on elastin congo-red (Sigma). Reaction buffer without elastase was used as blank. At end of 6 hr incubation, the absorbance of the supernatant containing cleaved congo-red was measured at 495nm.
