# Supplementary material for: Global Regulator MorA Affects Virulence-Associated Protease Secretion in Pseudomonas aeruginosa PAO1
Source: PubMed Central journal article supplement (PMC4404142; doi:10.1371/journal.pone.0123805), 2015-04-20

# Global Regulator MorA affects Virulence-associated Protease Secretion in *Pseudomonas aeruginosa* PAO1

## Supporting Information

S2 Figure. MALDI-ToF-ToF spectra of secreted proteins affected by MorA

A. PA0752

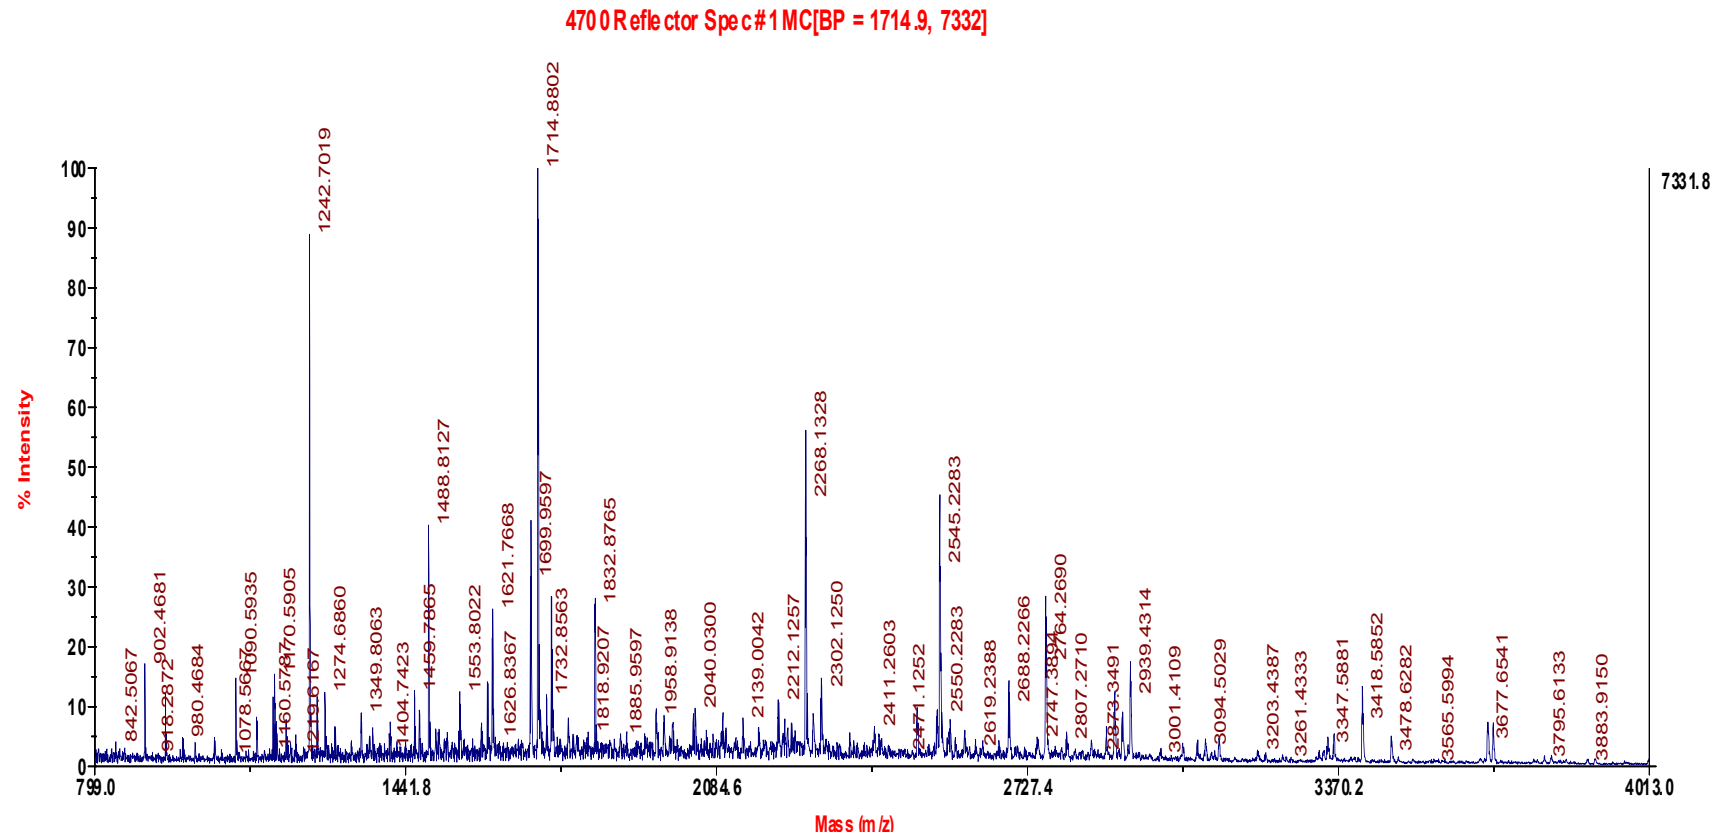

## B. Probable aminopeptidase

4700 Reflector Spec #1 MC[BP = 945.5,3469]

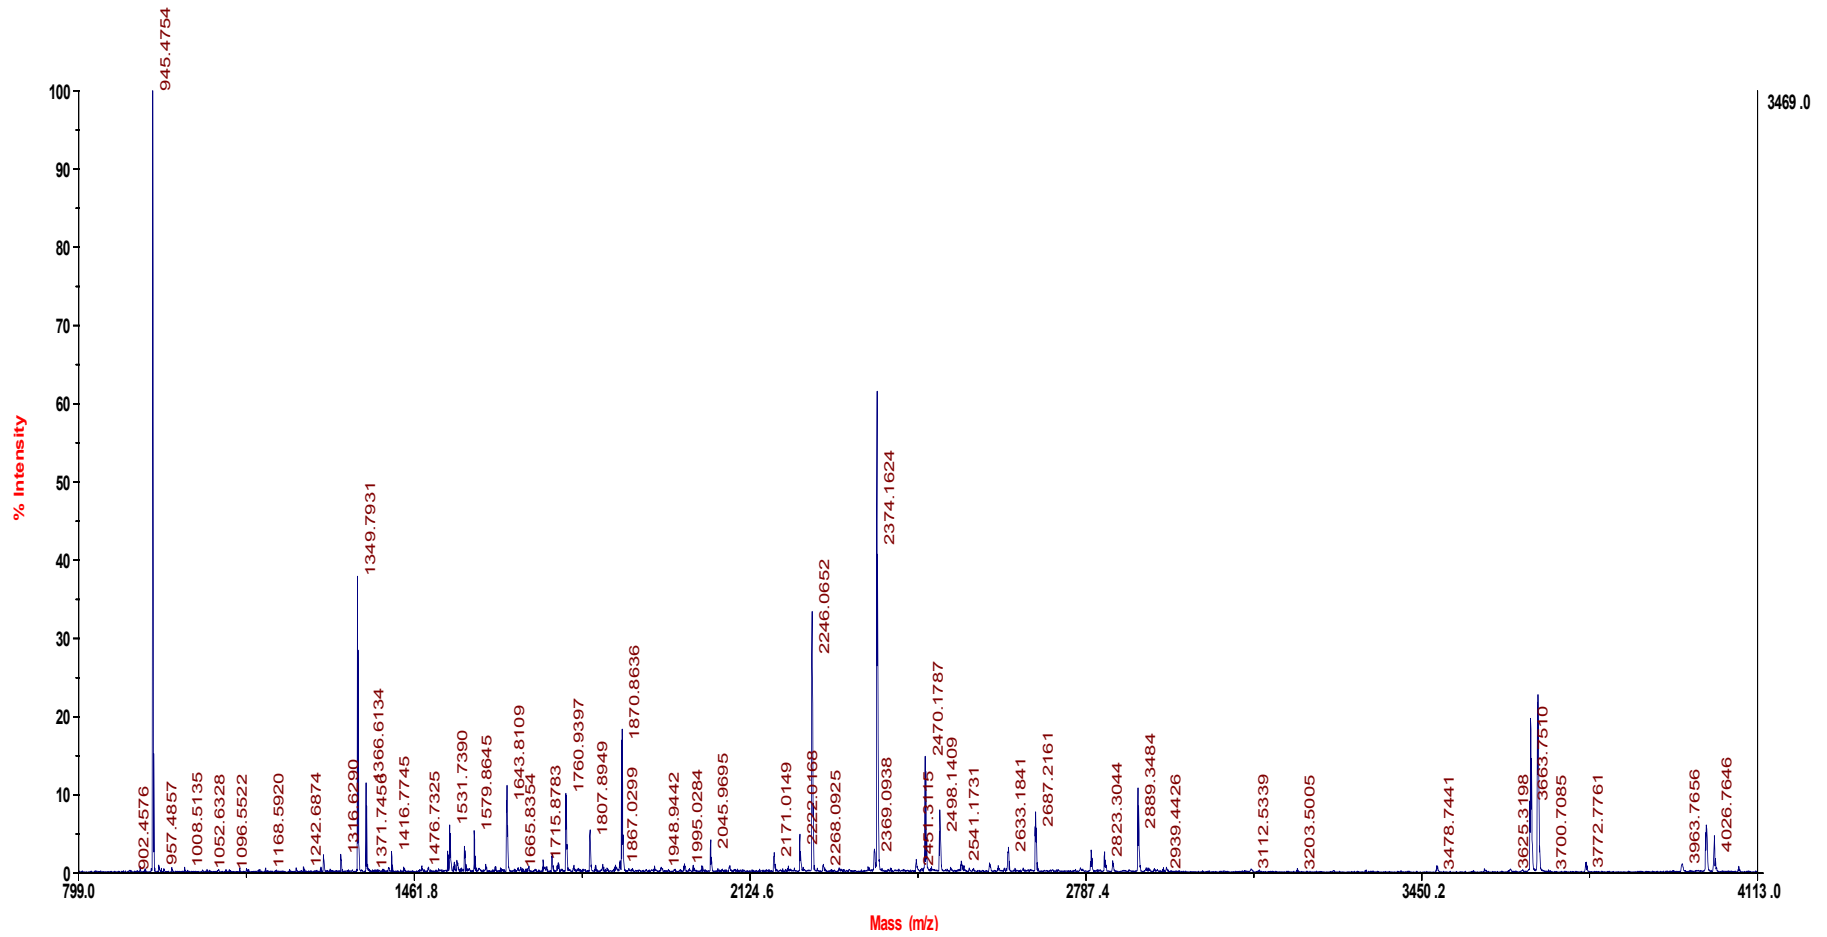

### C. Alkaline metalloproteinase precursor AprA

4700 Reflector Spec#1 MC[BP = 982.5, 16593]

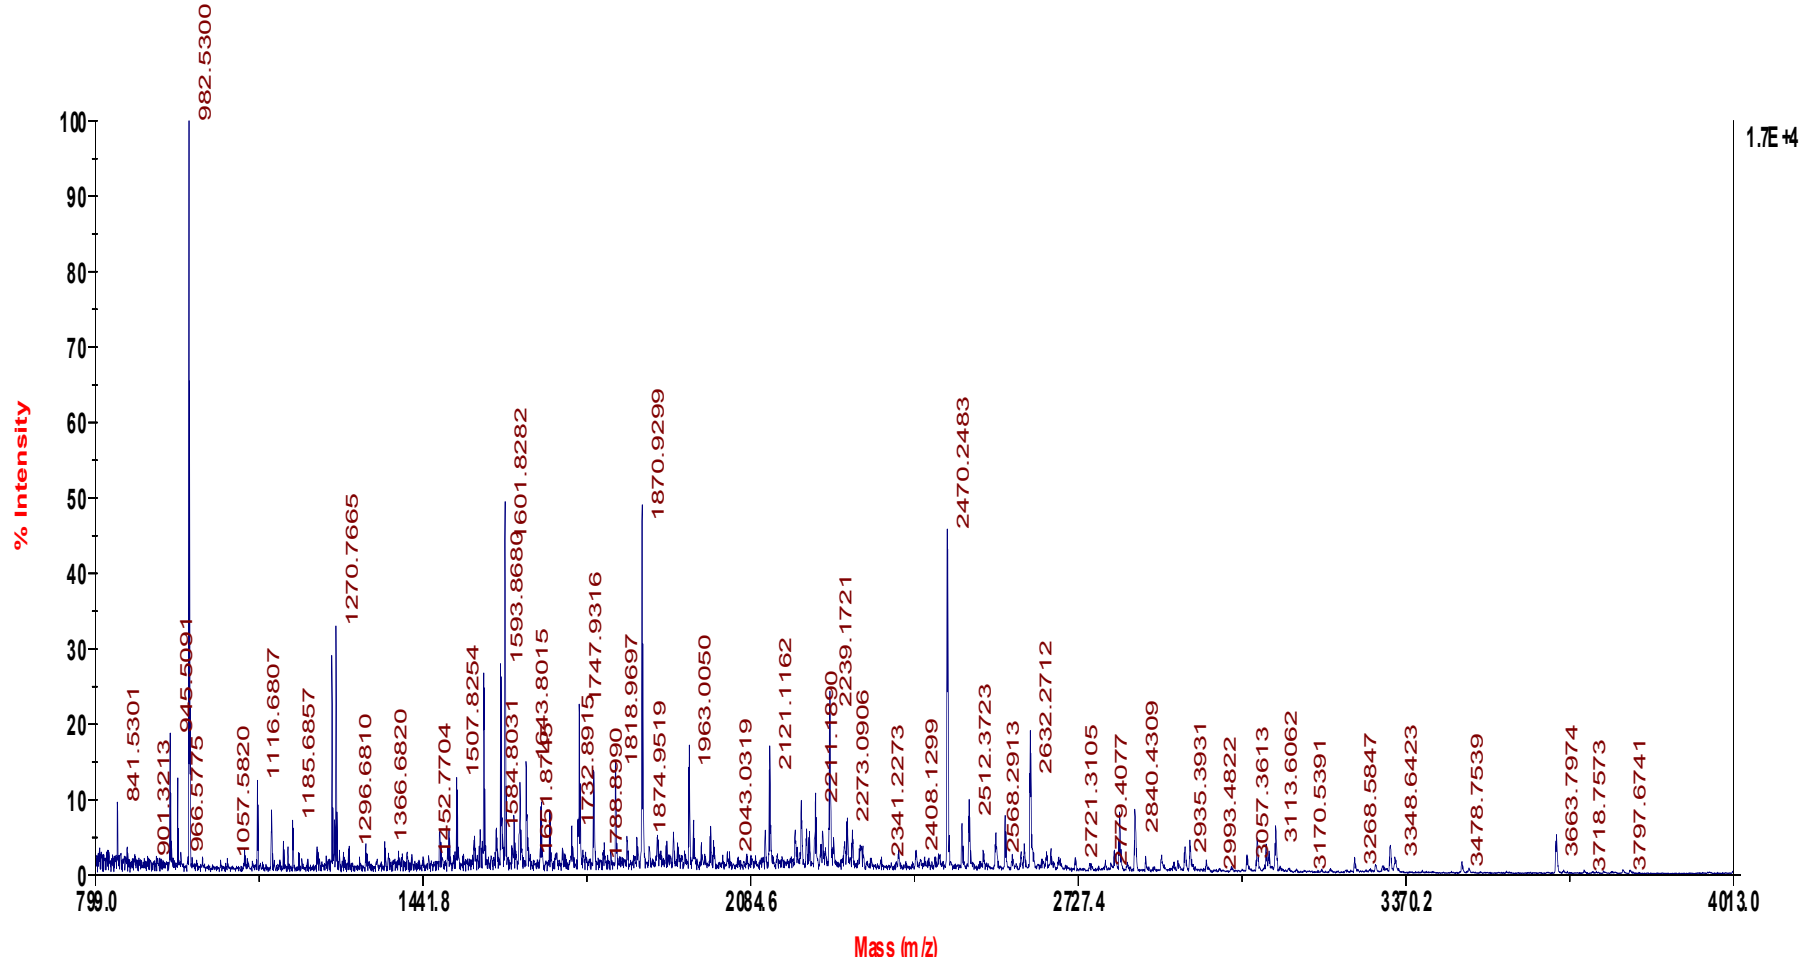

# D. Chitin binding protein CbpD

4700 Reflector Spec #1 MC[BP = 2172.0, 4113]

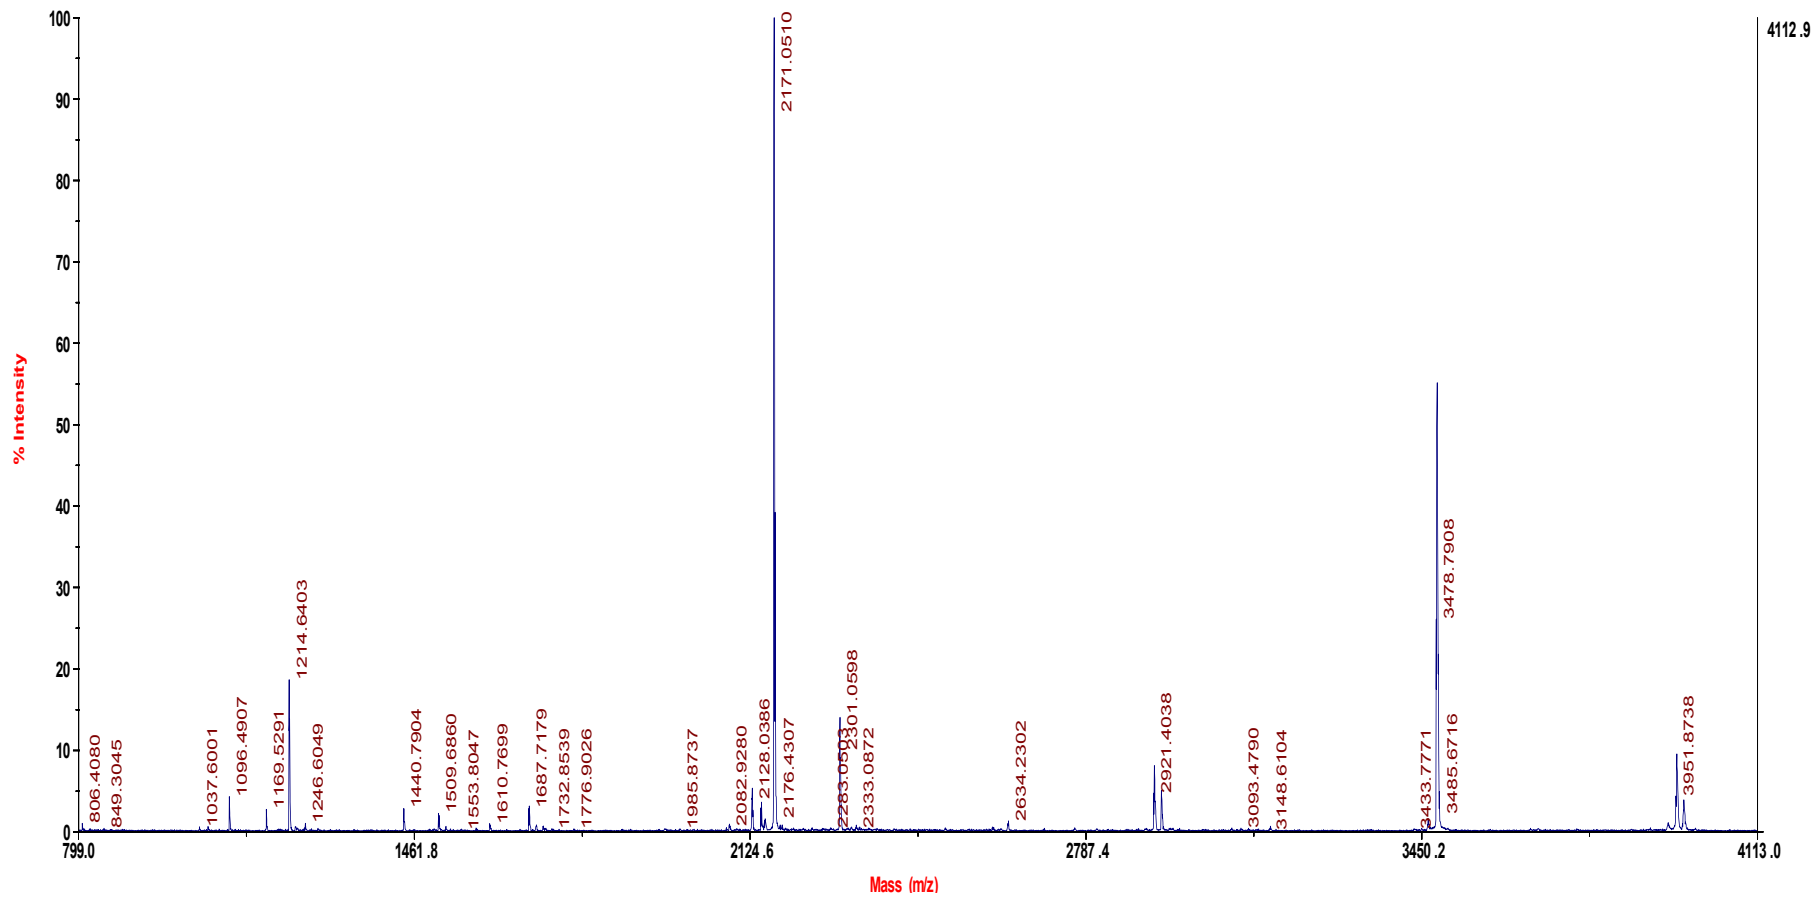

# E. Elastase LasB

4700 Reflector Spec #1 MC[BP = 1610.8, 1756]

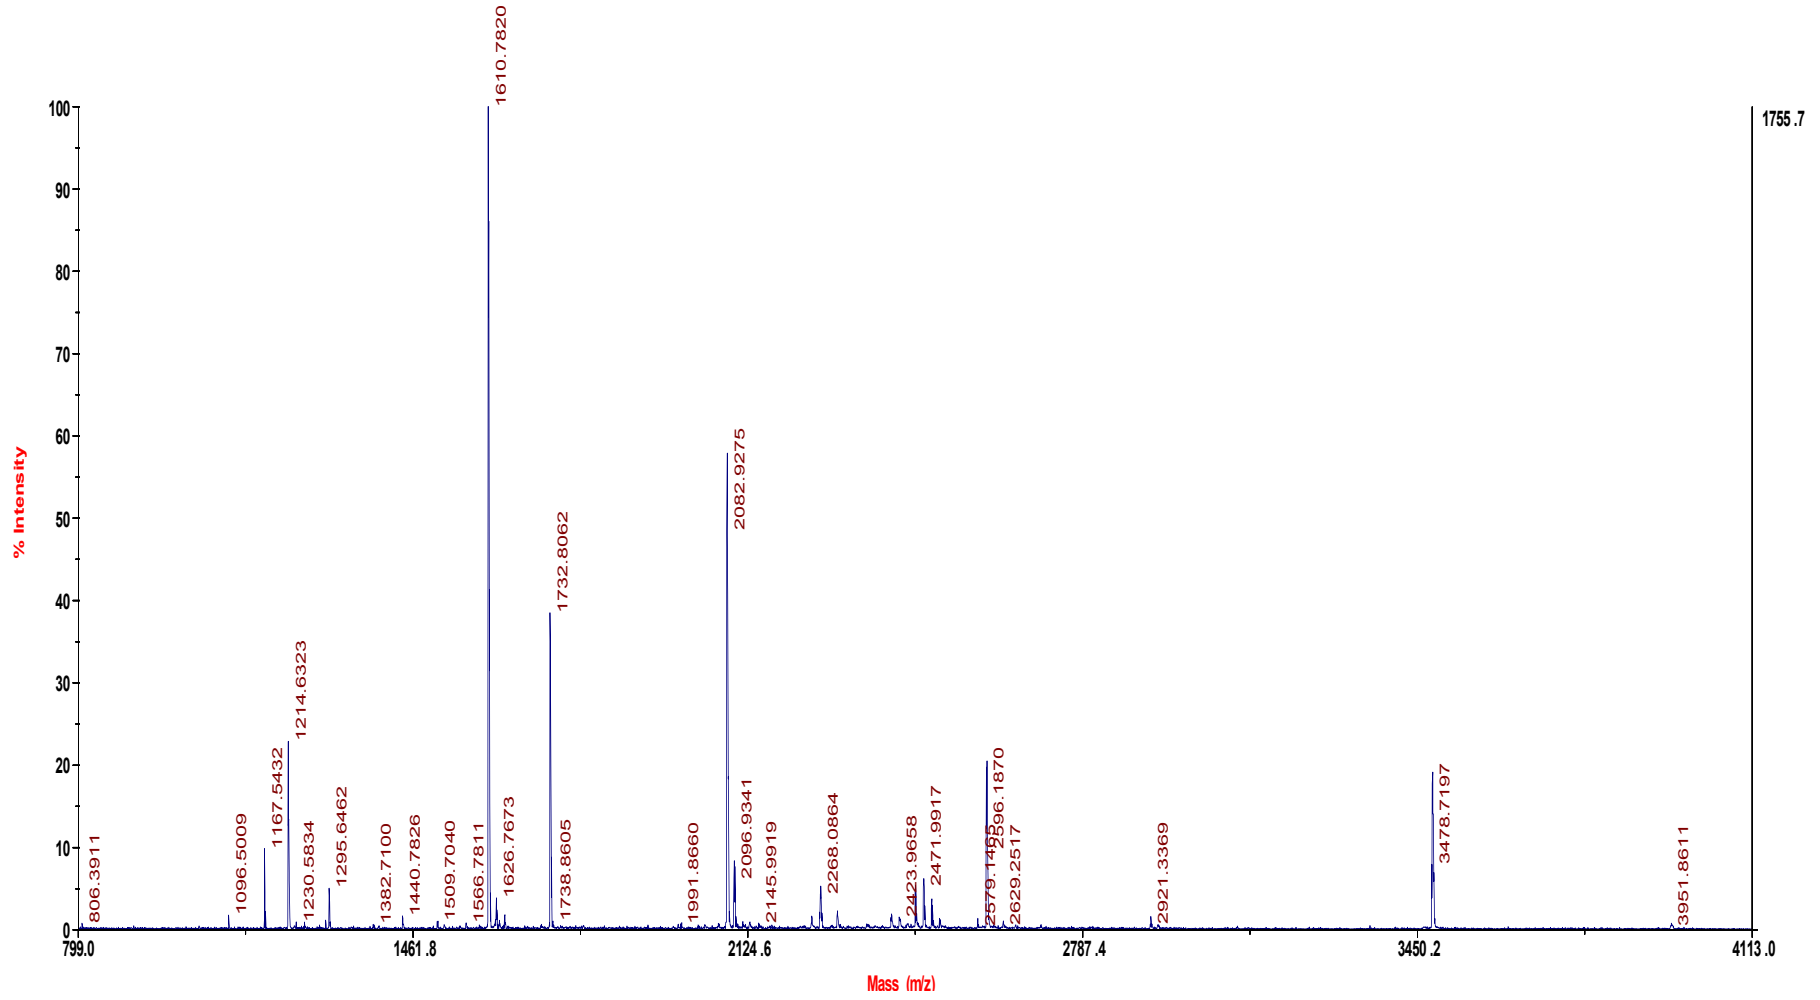

### F. PvdS-regulated endoprotease; lysyl class PrpL

4700 Reflector Spec #1 MC[BP = 2865.4, 2447]

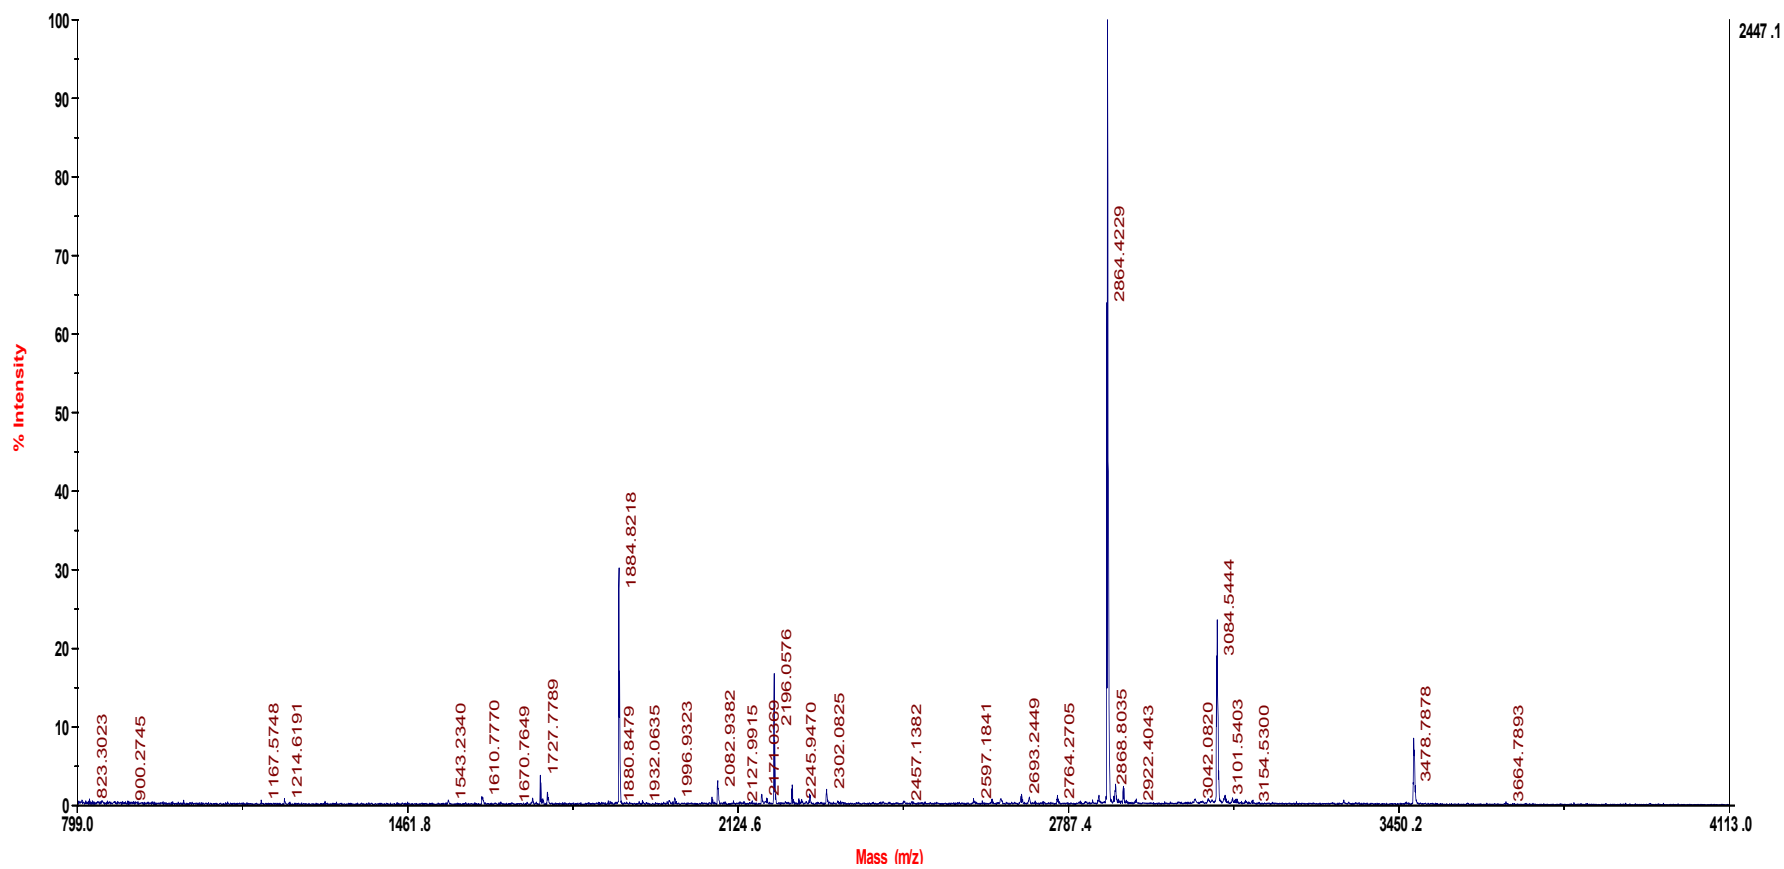

### G. Flagellar capping protein FliD

4700 Reflector Spec #1 MC[BP = 2212.0, 18233]

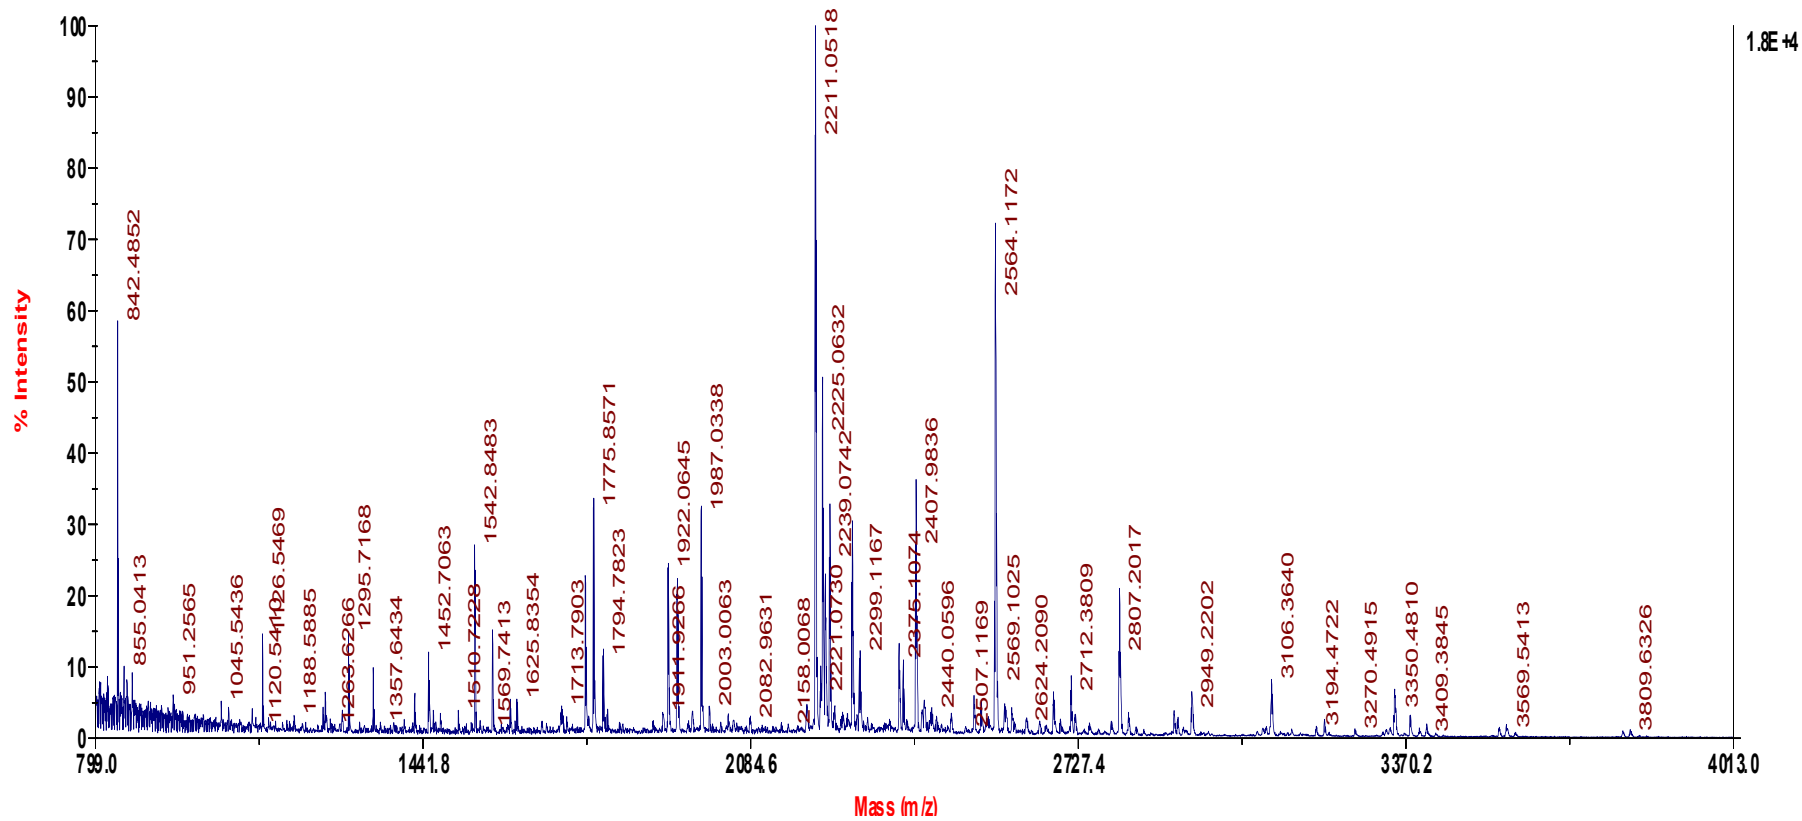

# H. Elastase LsaA

4700 Reflector Spec #1 MC[BP = 3484.5, 1460]

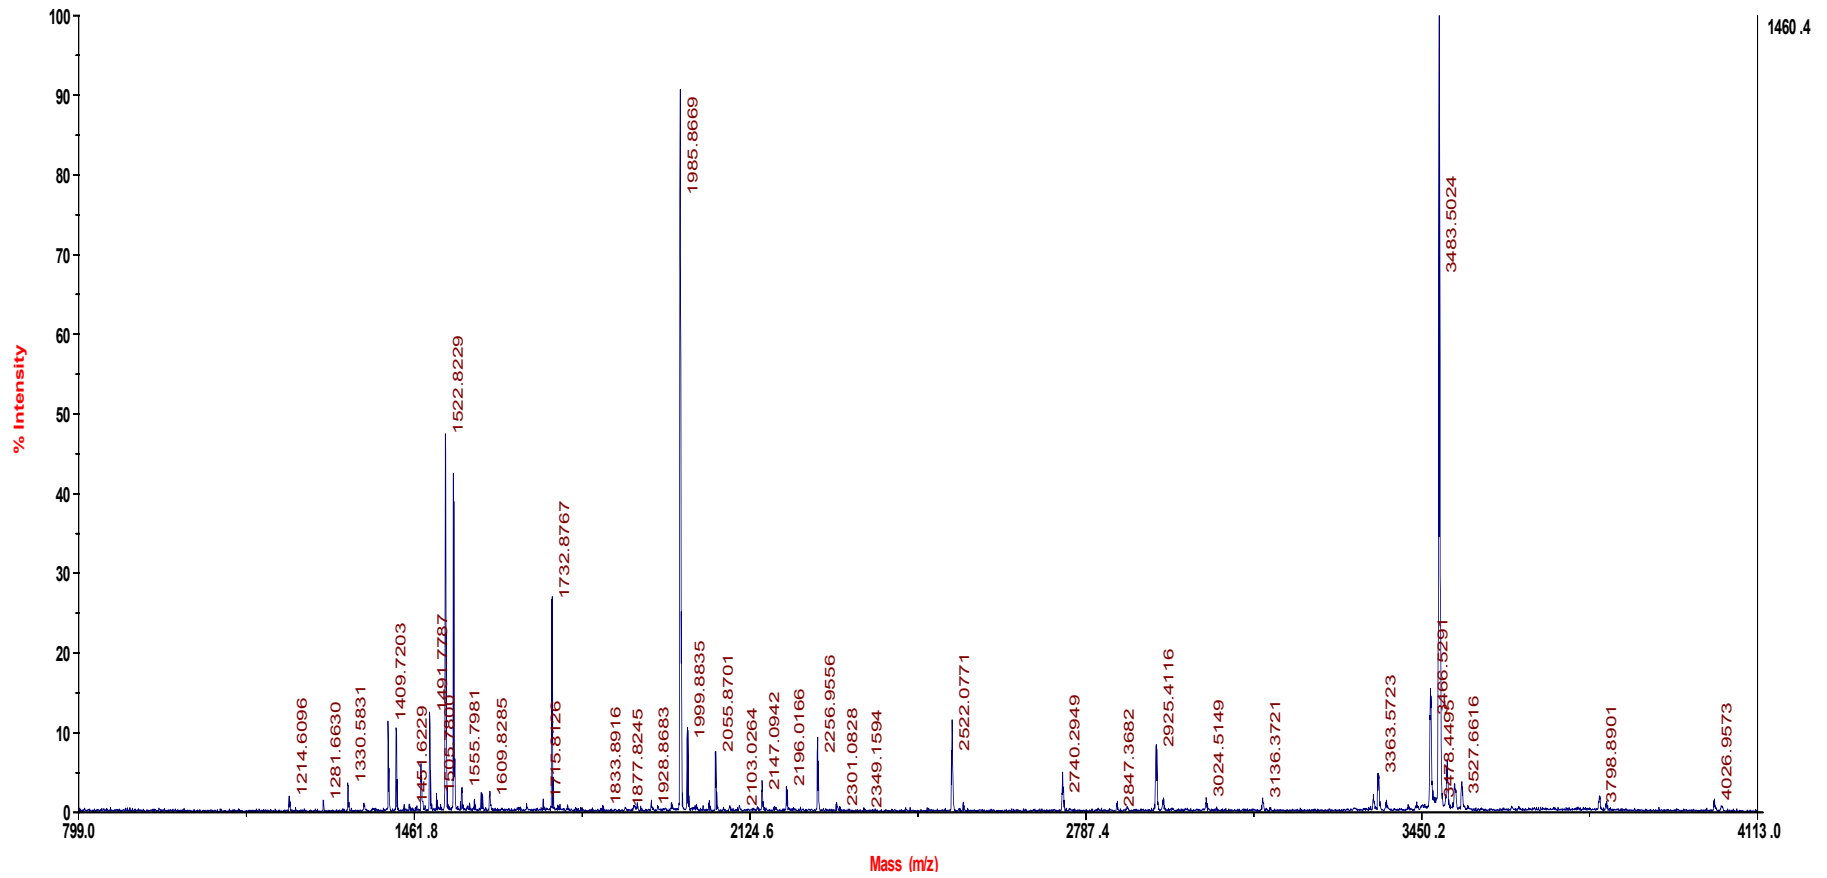

Supplement: pone.0123805.s002.pdf [file pone.0123805.s002.pdf]
