# Supplementary material for: Global Regulator MorA Affects Virulence-Associated Protease Secretion in Pseudomonas aeruginosa PAO1
Source: PubMed Central journal article supplement (PMC4404142; doi:10.1371/journal.pone.0123805), 2015-04-20
Supplement: pone.0123805.s004.pdf [file pone.0123805.s004.pdf]

# Global Regulator MorA affects Virulence-associated Protease Secretion in *Pseudomonas aeruginosa* PAO1

## Supporting Information

S1 Table. List of primers used in this study

| Primer                                                      | Primer sequence                           |           |
|-------------------------------------------------------------|-------------------------------------------|-----------|
| <b>Transcriptional analysis</b>                             |                                           |           |
| qRT_RpsL_F                                                  | 5' ACGTTGCGGG CAGTTCTG 3'                 |           |
| qRT_RpsL_R                                                  | 5' AGCCGCGTAA GCGTATCGT 3'                |           |
| LasB_qRT_Fwd                                                | 5' CCAGGCCAAG AGCCTGAAG 3'                |           |
| LasB_qRT_Rev                                                | 5' CGGATCACCA GTTCCACTTT G 3'             |           |
| CbpD_qRT_Fwd                                                | 5' CCGCAAGCA TGTGATCTAT AA 3'             |           |
| CbpD_qRT_Rev                                                | 5' CGTCGATGCA GCGTAGAA 3'                 |           |
| <b>Cloning for recombinant protein expression</b>           |                                           |           |
| LasB_FwBamHI2                                               | 5' CGCGGATCCA AGATCGGCAA GTACACCTAC GG 3' |           |
| LasB_RvHindIII2                                             | 5' TCAGAAGCTT TTACAACGCG CTCGGGCAGG 3'    |           |
| <b>Site-directed mutagenesis of MorA enzymatic domains*</b> |                                           |           |
| E1060K_Up_Fwd                                               | 5' CACTGGTTCG ACATCCGC 3'                 | 2023-2040 |
| E1060K_Up_Rev                                               | 5' GCAGCAGGGC CTTGGCGCCG GTCAG<br>3'      | 3577-3553 |
| E1060K_Dwn_Fwd                                              | 5' CTGACCGGCG GCAAGGCCCT GC 3'            | 3553-3574 |
| E1060K_Dwn_Rev                                              | 5' TCAGCCCTCG TTGAACATG 3'                | 4248-4230 |
| E1189K_Up_Fwd                                               | 5' CACTGGTTCG ACATCCGC 3'                 | 2023-2040 |
| E1189K_Up_Rev                                               | 5' CAGCAGGGTG AATTTGTCGC<br>CGCCAT 3'     | 3192-3166 |
| E1189K_Dwn_Fwd                                              | 5' ATGGGCGGCG ACAAATTCAC<br>CCTGCTG3'     | 3166-3192 |
| E1189K_Dwn_Rev                                              | 5' TCAGCCCTCG TTGAACATG 3'                | 4248-4230 |

\*The last column represents the primer position in *morA* gene
