# Supplementary material for: Global Regulator MorA Affects Virulence-Associated Protease Secretion in Pseudomonas aeruginosa PAO1
Source: PubMed Central journal article supplement (PMC4404142; doi:10.1371/journal.pone.0123805), 2015-04-20
Supplement: pone.0123805.s005.pdf [file pone.0123805.s005.pdf]

## Global Regulator MorA affects Virulence-associated Protease Secretion in *Pseudomonas aeruginosa* PAO1

### Supporting Information

**S2 Table. MALDI-ToF-ToF identification of *P. aeruginosa* secreted proteins affected by MorA.** Peptide mass tolerance and fragment mass tolerance were 100ppm and 0.2 Da respectively. At the maximum, 1 missed cleavage for trypsin was allowed.

| Band No. | No. of queries matches | Nominal Mass | Peptide sequences                                                                                                                                                                                                                                                                                                                                                                                                                                                                                                            | Accession number | Genbank Identifier | Protein name/function | Sequence coverage |
|----------|------------------------|--------------|------------------------------------------------------------------------------------------------------------------------------------------------------------------------------------------------------------------------------------------------------------------------------------------------------------------------------------------------------------------------------------------------------------------------------------------------------------------------------------------------------------------------------|------------------|--------------------|-----------------------|-------------------|
| 1        | 35                     | 100615       | 1. MSLSTTAFPSLQGENMSRSPPIR<br>2. GLAYGTNVLTQLSGTNAAHAP<br>LLKR<br>3. LLVLGNGASAASLSATVR<br>4. SVELGGAYGQDPALVQQIVDG<br>SWR<br>5. AQNLFALPGTTSLR<br>6. LWLLWADAVR<br>7. AADTARFQETFVADAIVGYVR<br>8. FQETFVADAIVGYVR<br>9. QQSMPVSGSEETLTLTLPSAQQ<br>FTAIGR<br>10. LSIRIEDAGQASLAVGLNTQR<br>11. IEDAGQASLAVGLNTQR<br>12. LQANQSVALVSPYGGLLQLVY<br>SGATPGQTVTVK<br>13. VTGAASQPFLDIQPGEDSSQAI<br>ADFIQALDADK<br>14. ADWLEIR<br>15. GWGESHELGHNLQVNR<br>16. SGEISNQIFPLHK<br>17. EFGQNLDLTR<br>18. NAYNLIVAGR<br>19. AEADPLAGVYK | PA0572           | GI:15595769        | Hypothetical protein  | 43%               |

|   |    |       |                                                                                                                                                                                                                                                                                                                                              |        |             |                                                  |     |
|---|----|-------|----------------------------------------------------------------------------------------------------------------------------------------------------------------------------------------------------------------------------------------------------------------------------------------------------------------------------------------------|--------|-------------|--------------------------------------------------|-----|
|   |    |       | 20. LWEDPGTYALNGER<br>21. MAFYTQWVHYWADLK<br>22. NDPLQGWDIWTLLEYLHQR<br>23. DQRPTFALWGIR<br>24. TSAAAQAQVAAYGFAEQPAFF<br>YANNR                                                                                                                                                                                                               |        |             |                                                  |     |
| 2 | 23 | 57824 | 1. SPLLVSTPLGLPR<br>2. LEDIASLNDGNR<br>3. AAATPGYQASVDYVK<br>4. VSVQPFPTAYYPK<br>5. GPGSLSATVPQPVTYEWEKDF<br>TYLSQTEAGDVTAK<br>6. DFTYLSQTEAGDVTAK<br>7. AENAAAAGAAGVIIFNQNTD<br>DRK<br>8. KTETYNVVAETR<br>9. FAWWGAEAEAGLVGSTHYVQN<br>LAPEEK<br>10. LFEAYFR<br>11. GQQSEGTEIDFR<br>12. SDYAEFFNSGIAFGGLFTGAEG<br>LK<br>13. YGGTAGKAYDECYHSK | PA2939 | GI:15598135 | Proabable<br>aminopeptidase                      | 39% |
| 3 | 13 | 50402 | 1. SDAYTQVDNFLHAYAR<br>2. GGDELVNGHPSYTVDAQAEQI<br>LR<br>3. APGDSVLTLSYSFLTKPNDFFN<br>TPWK<br>4. AYSVMSYWEEQNTGQDFK<br>5. GAYSSAPLLDDIAAIQK<br>6. TGDTVYGFNSNTER<br>7. LVFSVWDAGGNDTLDFSGFSQ<br>NQK<br>8. IDLSGLDAFVNGGLVLQYVDA<br>FAGK                                                                                                      | PA1249 | GI:15596446 | AprA  Alkaline<br>metalloproteinase<br>precursor | 34% |

|   |    |       |                                                                                                                                                                                                                                                                                                                                                                                                                                                                                                                |        |              |                                          |     |
|---|----|-------|----------------------------------------------------------------------------------------------------------------------------------------------------------------------------------------------------------------------------------------------------------------------------------------------------------------------------------------------------------------------------------------------------------------------------------------------------------------------------------------------------------------|--------|--------------|------------------------------------------|-----|
| 4 | 16 | 42398 | <ol style="list-style-type: none"> <li>1. AAVAAGGTQALYDWNGVNQ<br/>GNANGNHQAVVPDGLCGAG<br/>K</li> <li>2. SDWPSTAIAPDASGNFQFVYK</li> <li>3. YDFYITK</li> <li>4. HVIYNVWQR</li> <li>5. AQQDLPAGATVTLR</li> <li>6. LFDAQGR</li> <li>7. QWPLALAQK</li> <li>8. VNQDSTLVNIGVLDAYGAVSP<br/>VASSQDNQVYVR</li> <li>9. FQVDIELPVEGGGEQPGGDGK</li> <li>10. VDFDYPQGLQQYDAGTVVR</li> <li>11. GWDLYYAPGK</li> </ol>                                                                                                          | PA0852 | GI:116048775 | CbpD Chitin<br>binding protein           | 49% |
| 5 | 20 | 33354 | <ol style="list-style-type: none"> <li>1. IGKYTYGSDYGPLIVNDR</li> <li>2. YTYGSDYGPLIVNDR</li> <li>3. FACPTNTYK</li> <li>4. QVNGAYSPLNDAHFFGGVVFVK</li> <li>5. LYRDWFGTSPLTHK</li> <li>6. DWFGTSPLTHK</li> <li>7. GQSGGMNEAFSDMAGEAAEF<br/>YMR</li> <li>8. GKNDFLIGYDIK</li> <li>9. YMDQPSRDGR</li> <li>10. YMDQPSR</li> <li>11. SIDNASQYYNGIDVHHSSGVY<br/>NR</li> <li>12. AFYLLANSPGWDTRK</li> <li>13. AFYLLANSPGWDTR</li> <li>14. AFEVFDANR</li> <li>15. YYWTATSNYNSGACGVIR</li> <li>16. NYSAADVTR</li> </ol> | PA3724 | GI:15598919  | LasB  Elastase                           | 51% |
| 6 | 9  | 48589 | <ol style="list-style-type: none"> <li>1. MVFTSSADGGSYICTGTLNNG<br/>NSPK</li> <li>2. TPPAGVFYQGWSATPIANGSLG</li> </ol>                                                                                                                                                                                                                                                                                                                                                                                         | PA4175 | GI:15599370  | PrpL  PvdS<br>regulated<br>endoprotease; | 31% |

|   |    |       |                                                                                                                                                                                                                                                                       |        |             |                                    |     |
|---|----|-------|-----------------------------------------------------------------------------------------------------------------------------------------------------------------------------------------------------------------------------------------------------------------------|--------|-------------|------------------------------------|-----|
|   |    |       | HDIHHPR<br>3. YSQGNVSAVGVTYDGHTALTR<br>4. VDWPSAVVEGGSSGSGLLTVA<br>GDGSYQLR<br>5. NDYFSDFSGVYSQISR                                                                                                                                                                    |        |             | lysyl class                        |     |
| 7 | 19 | 49420 | 1. ASATQSAVAGTYQIQVNSLATS<br>SK<br>2. IALQAIADPANAK<br>3. FNSGTLNISVGDTK<br>4. LPAITVDSSNNTLAGMR<br>5. DAINQAGKEAGVSATIITDNSG<br>SR<br>6. VEVSDDGSGGNTSLSQLAFDP<br>ATAPK<br>7. AANGEITVDGLKR<br>8. SIASNSVSDVIDGVSFVVK<br>9. AVTEAGKPITLTVSR<br>10. LTTQFNLLSAMQDEMTK | PA1094 | GI:15596291 | FliD  Flagellar<br>capping protein | 38% |
| 8 | 7  | 45721 | 1. AVGEDGLNAASAALLGLLREG<br>AK<br>2. QGYWQPNGAHSNTGSGYPYS<br>SFDASYDWPR<br>3. WGSATYSVVA AHAGTVR<br>4. VTHPSGWATNYHMDQIQVS<br>NGQQVSADTK<br>5. YYFYNSAGTTHCAFRPLYNP<br>GLAL                                                                                           | PA1871 | GI:15597068 | LasA  Elastase                     | 30% |
